# Supplementary material
Source: PubMed Central journal article supplement (PMC6764001)

## Supplementary Online Content

Gauss T, Ageron F-X, Devaud M-L, et al; French Trauma Research Initiative. Association of prehospital time to in-hospital trauma mortality in a physician-staffed emergency medicine system. *JAMA Surg*. Published online September 25, 2019. doi:10.1001/jamasurg.2019.3475

**eTable 1.** Complete list of collected variables

**eTable 2.** Characteristics of patients excluded for analysis and missing data

**eTable 3.** Transportation mode and time according to regional database.

**eTable 4.** Pre-hospital Interventions and Total Pre-hospital Time

**eTable 5.** Generalized Linear Mixed Model with primary outcome all-causes of death.

**eTable 6.** Generalized Linear Mixed Model with primary outcome all-causes of death.

**eFigure 1.** Flowchart of study

**eFigure 2.** Adjusted Generalized Additive Model for individual confounders as logarithmic function (prehospital time, age, systolic blood pressure, Injury Severity Score, GCS); the Y-axis represents the functional risk of death

This supplementary material has been provided by the authors to give readers additional information about their work.

**eTable 1. Complete list of collected variables**

| <b>Demographics</b> | <b>Prehospital</b>         | <b>Hospital</b>     | <b>Outcome and follow-up</b> |
|---------------------|----------------------------|---------------------|------------------------------|
| Age                 | MICU team                  | Hospital name       | In-hospital death            |
| Gender              | Glasgow coma scale         | Hospital level      | Cause of death               |
| Mechanism of injury | Blood pressure             | Glasgow coma scale  | Length of stay (ICU)         |
| Circumstances       | Respiratory rate           | Blood pressure      | Length of ventilation        |
| Place of accident   | Heart rate                 | Respiratory rate    | Withdrawal of treatment      |
| Date of accident    | Pulse oximetry             | Heart rate          | Abbreviated injury scale     |
|                     | Pupil size                 | Pulse oximetry      | Injury severity score        |
|                     | Intubation                 | Pupil size          |                              |
|                     | Fluid resuscitation        | Intubation          |                              |
|                     | Vasopressor use            | Fluid resuscitation |                              |
|                     | Osmotherapy                | Vasopressor use     |                              |
|                     | Arrival on scene (time)    | Osmotherapy         |                              |
|                     | Arrival at hospital (time) | Surgery             |                              |
|                     | Transportation type        | Treatment           |                              |
|                     | Cardiac arrest             | Para-clinical tests |                              |

**eTable 2. Characteristics of patients excluded for analysis and missing data**

|                                        | <b>Considered for analysis<br/>N=10,126</b> | <b>Not considered for analysis<br/>due to missing data on<br/>prehospital time<br/>N=3,633</b> |
|----------------------------------------|---------------------------------------------|------------------------------------------------------------------------------------------------|
| Age, mean (95%CI)                      | 41 (40-41)                                  | 41 (40-41)                                                                                     |
| Sex male, N; % (95%CI)                 | 7,937; 78% (78-79)                          | 2,828; 78% (76-79)                                                                             |
| Penetrating injury, N; % (95%CI)       | 861; 9% (8-9)                               | 351; 10% (9-11)                                                                                |
| Road traffic injury, N; % (95%CI)      | 5,598; 55%(54-56)                           | 1,551; 43% (41-44)                                                                             |
| Fall, N; % (95%CI)                     | 3,053; 30% (29-31)                          | 1,389; 38% (37-40)                                                                             |
| SBP mean (95%CI)                       | 117 (116-117)                               | 120 (119-121)                                                                                  |
| GCS, mean (95%CI)                      | 13 (13-13)                                  | 13 (13-13)                                                                                     |
| N ;% (95%CI)                           |                                             |                                                                                                |
| 3-8                                    | 1,518; 15% (14-16)                          | 497; 15% (14-17)                                                                               |
| 9-13                                   | 963; 10% (9-10)                             | 293; 9% (8-10)                                                                                 |
| 14-15                                  | 7,453; 74% (73-74)                          | 2,461; 76% (74-77)                                                                             |
| Prehospital intubation N ;%<br>(95%CI) | 2,321; 23% (22-24)                          | 704; 19% (18-21)                                                                               |
| Haemorrhagic shock, N ;%<br>(95%CI)    | 1,010; 10% (9-11)                           | 287; 8% (7-9)                                                                                  |
| AIS Head $\geq$ 3, N ;% (95%CI)        | 2,724; 27% (26-28)                          | 1,053; 29% (28-30)                                                                             |
| Mean ISS                               | 17 (17-18)                                  | 17 (16-17)                                                                                     |
| ISS >15, N ;% (95%CI)                  | 4,757; 47% (46-48)                          | 1,692; 47% (45-48)                                                                             |
| In-hospital Death, N ;% (95%CI)        | 968; 10% (9-10)                             | 291; 8% (7-9)                                                                                  |

AIS=abbreviated injury scale, GCS=Glasgow Coma Scale, ISS=Injury severity score, SBP=systolic blood pressure

**eTable 3. Transportation mode and time according to regional database.**

|                                                 | <b>Total</b> | <b>Paris_ Ile de<br/>France<br/>(TRAUMABASE)</b> | <b>Northern French<br/>Alps (TRENAU)</b> |
|-------------------------------------------------|--------------|--------------------------------------------------|------------------------------------------|
|                                                 | N=10,126     | N=5,067                                          | N=5,059                                  |
| Ambulance transportation, N (%)                 | 7,434 (76)   | 4,319 (89)                                       | 3,115 (63)                               |
| Helicopter transportation, N (%)                | 2,367 (24)   | 516 (11)                                         | 1,851 (37)                               |
| Transport to designated trauma<br>center, N (%) | 9,098 (90)   | 5,067 (100)                                      | 4,031 (80)                               |
| Median TPT [IQR]                                | 65 [49-90]   | 73 [54-100]                                      | 60 [45-80]                               |
| Total Prehospital time <sup>a</sup> , N (%)     |              |                                                  |                                          |
| 0-29 min                                        | 514 (5)      | 247 (5)                                          | 267 (5)                                  |
| 30-59 min                                       | 3,535 (35)   | 1,335 (26)                                       | 2,200 (43)                               |
| 60-89 min                                       | 3,459 (34)   | 1,762 (35)                                       | 1,697 (34)                               |
| 90-119 min                                      | 1,624 (16)   | 999 (20)                                         | 625 (12)                                 |
| 120-179min                                      | 870 (9)      | 630 (12)                                         | 240 (5)                                  |
| 180 + min                                       | 124 (1)      | 94 (2)                                           | 30 (1)                                   |

<sup>a</sup>TPT = Total Prehospital Time, arrival of the physician-lead prehospital care-team on scene to arrival at the hospital

**eTable 4. Pre-hospital Interventions and Total Pre-hospital Time**

|                                    | <b>Total</b> | <b>Oro-tracheal<br/>intubation<br/>N (%)</b> | <b>Resuscitation<br/>fluid &gt;1000 ml<br/>N (%)</b> | <b>Vasopressor<br/>use<br/>N (%)</b> | <b>Osmotherapy<br/>N (%)</b> |
|------------------------------------|--------------|----------------------------------------------|------------------------------------------------------|--------------------------------------|------------------------------|
| 0-29 min                           | 514          | 49 (10)                                      | 71 (14)                                              | 24 (5)                               | 11 (2)                       |
| 30-59 min                          | 3,535        | 488 (14)                                     | 578 (16)                                             | 203 (6)                              | 131 (4)                      |
| 60-89 min                          | 3,459        | 794 (23)                                     | 806 (23)                                             | 328 (10)                             | 210 (6)                      |
| 90-119 min                         | 1,624        | 555 (34)                                     | 550 (34)                                             | 242 (15)                             | 123 (8)                      |
| 120-<br>179min                     | 870          | 391 (45)                                     | 365 (42)                                             | 153 (18)                             | 76 (9)                       |
| 180 + min                          | 124          | 67 (54)                                      | 68 (54)                                              | 32 (26)                              | 18 (14)                      |
| Total                              | 10,126       | 2,321 (23)                                   | 2,438 (24)                                           | 982 (10)                             | 569 (6)                      |
| P value for<br>Homogeneity<br>test |              | <0.001                                       | <0.001                                               | <0.001                               | <0.001                       |

<sup>a</sup>TPT = Total Prehospital Time, arrival of the physician-lead prehospital care-team on scene to arrival at the hospital

**eTable 5. Generalized Linear Mixed Model with primary outcome all-causes of death.**

|                                     | <b>Estimate</b>     | <b>Standard error</b> | <b>P-Value</b> | <b>Odds ratio</b> | <b>95% CI</b> |
|-------------------------------------|---------------------|-----------------------|----------------|-------------------|---------------|
| Prehospital time<br>(by 10 minutes) | 0.0389              | 0.0145                | 0.007          | 1.040             | 1.011 – 1.069 |
| Age                                 | -0.0366             | 0.0131                | 0.005          | 0.964             | 0.940-0.989   |
| Age^2                               | 0.0090              | 0.0001                | <0.001         | 1.001             | 1.001-1.001   |
| SBP                                 | -0.0399             | 0.0074                | <0.001         | 0.961             | 0.947-0.975   |
| SBP^2                               | 3.6 e <sup>-5</sup> | 8.9e <sup>-5</sup>    | 0.687          | 1.00              | 0.999-1.000   |
| SBP^3                               | 6.9 e <sup>-7</sup> | 2.9e <sup>-7</sup>    | 0.02           | 1.00              | 1.00-1.00     |
| ISS                                 | 0.1789              | 0.0342                | <0.001         | 1.196             | 1.130 – 1.265 |
| ISS^2                               | -0.0032             | 8.6 e <sup>-4</sup>   | <0.001         | 0.997             | 0.995-0.998   |
| ISS^3                               | 2.5 e <sup>-5</sup> | 7.6 e <sup>-6</sup>   | 0.001          | 1.00              | 1.00 -1.00    |
| GCS                                 | -0.0260             | 0.0083                | <0.001         | 0.786             | 0.770 – 0.803 |

^2: quadratic term; ^3 cubic term; SBP: Systolic blood pressure; ISS: Injury Severity Score; GCS: Glasgow Coma Scale.  
Random effect by Registry and EMS system

**eTable 6. Generalized Linear Mixed Model with primary outcome all-causes of death.**

|                  | <b>OR (95% CI)</b> | <b>P value</b> |
|------------------|--------------------|----------------|
| TPT by 10 min    | 1.04 (1.01-1.07)   | 0.002          |
| Age              | 0.96 (0.95-0.99)   | 0.006          |
| Age <sup>2</sup> | 1.001 (1.00-1.001) | <0.001         |
| SBP              | 0.95 (0.94-0.96)   | <0.001         |
| SBP <sup>2</sup> | 1.00 (1.00-1.00)   | <0.001         |
| GCS              | 0.56 (0.49-0.65)   | <0.001         |
| GCS <sup>2</sup> | 1.02 (1.01-1.02)   | <0.001         |
| ISS              | 1.18 (1.11-1.25)   | <0.001         |
| ISS <sup>2</sup> | 0.99 (0.99-0.99)   | 0.002          |
| ISS <sup>3</sup> | 1.00 (1.00-1.00)   | 0.006          |

TPT : Total Prehospital Time, SBP :Systolic Blood Pressure ; GCS ; Glasgow Coma Scale ; ISS :Injury Severity Scale.<sup>2</sup>indicates quadratic term <sup>3</sup>indicates cubic terms.

**eFigure 1. Flowchart of study**

Fig 1. Study flow chart based on the Northern French Alps and Paris-Ile-de-France Registries.

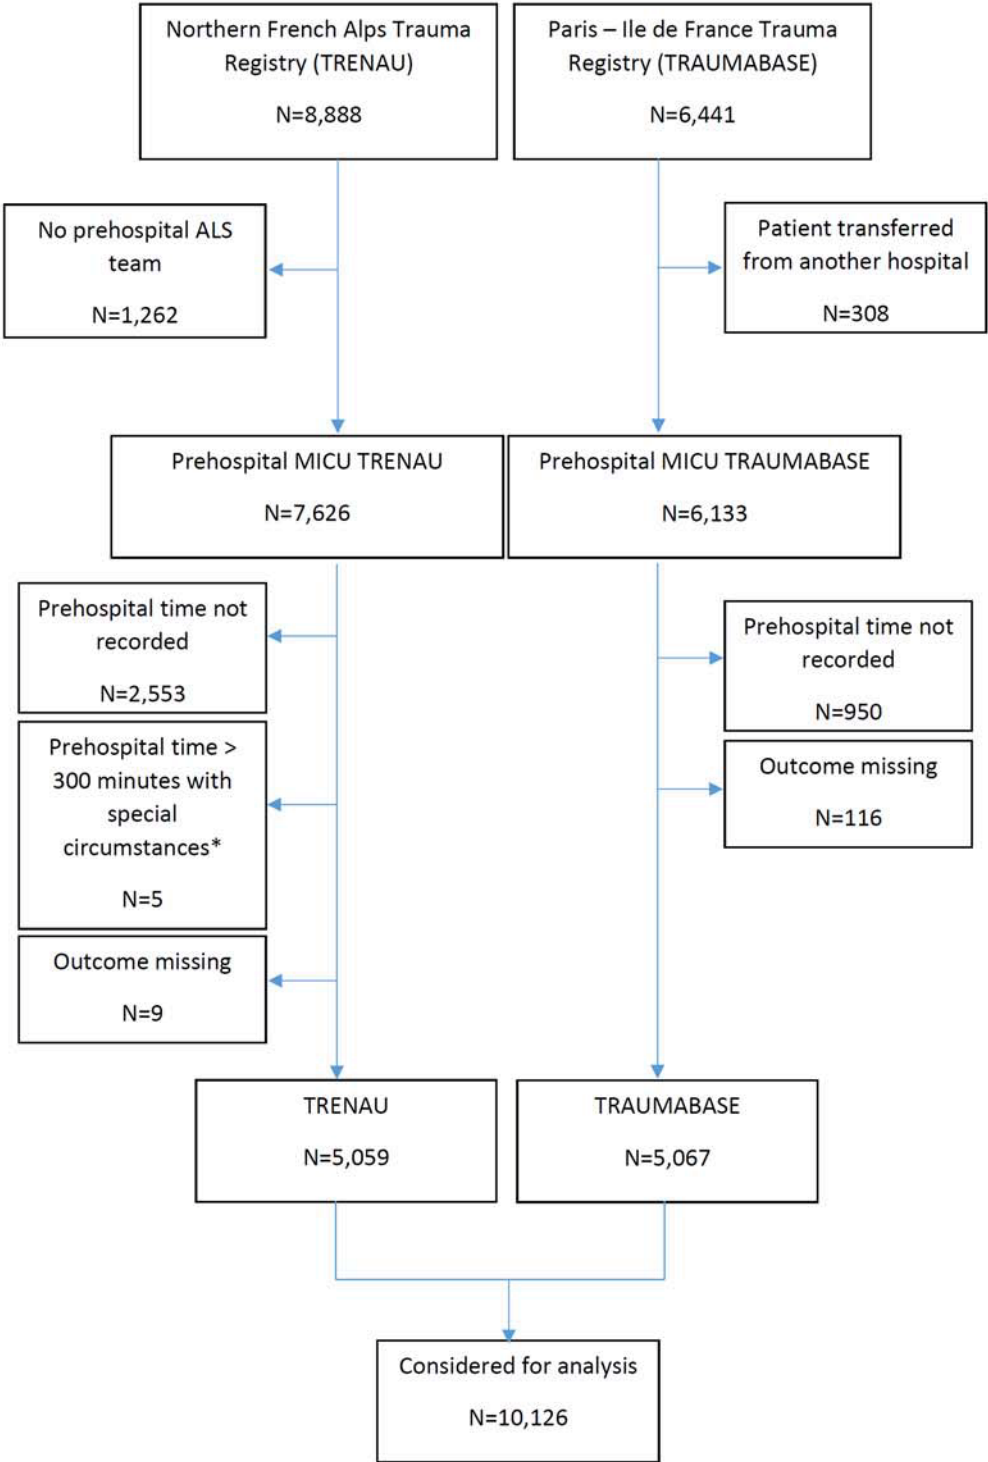

MICU: Mobile Intensive Care Unit

\*Mountain rescue: Speleology (1), Pedestrian transportation (2), Meteorological concerns (2)



**eFigure 2. Adjusted Generalized Additive Model for individual confounders as logarithmic function (prehospital time, age, systolic blood pressure, Injury Severity Score, GCS); the Y-axis represents the functional risk of death**

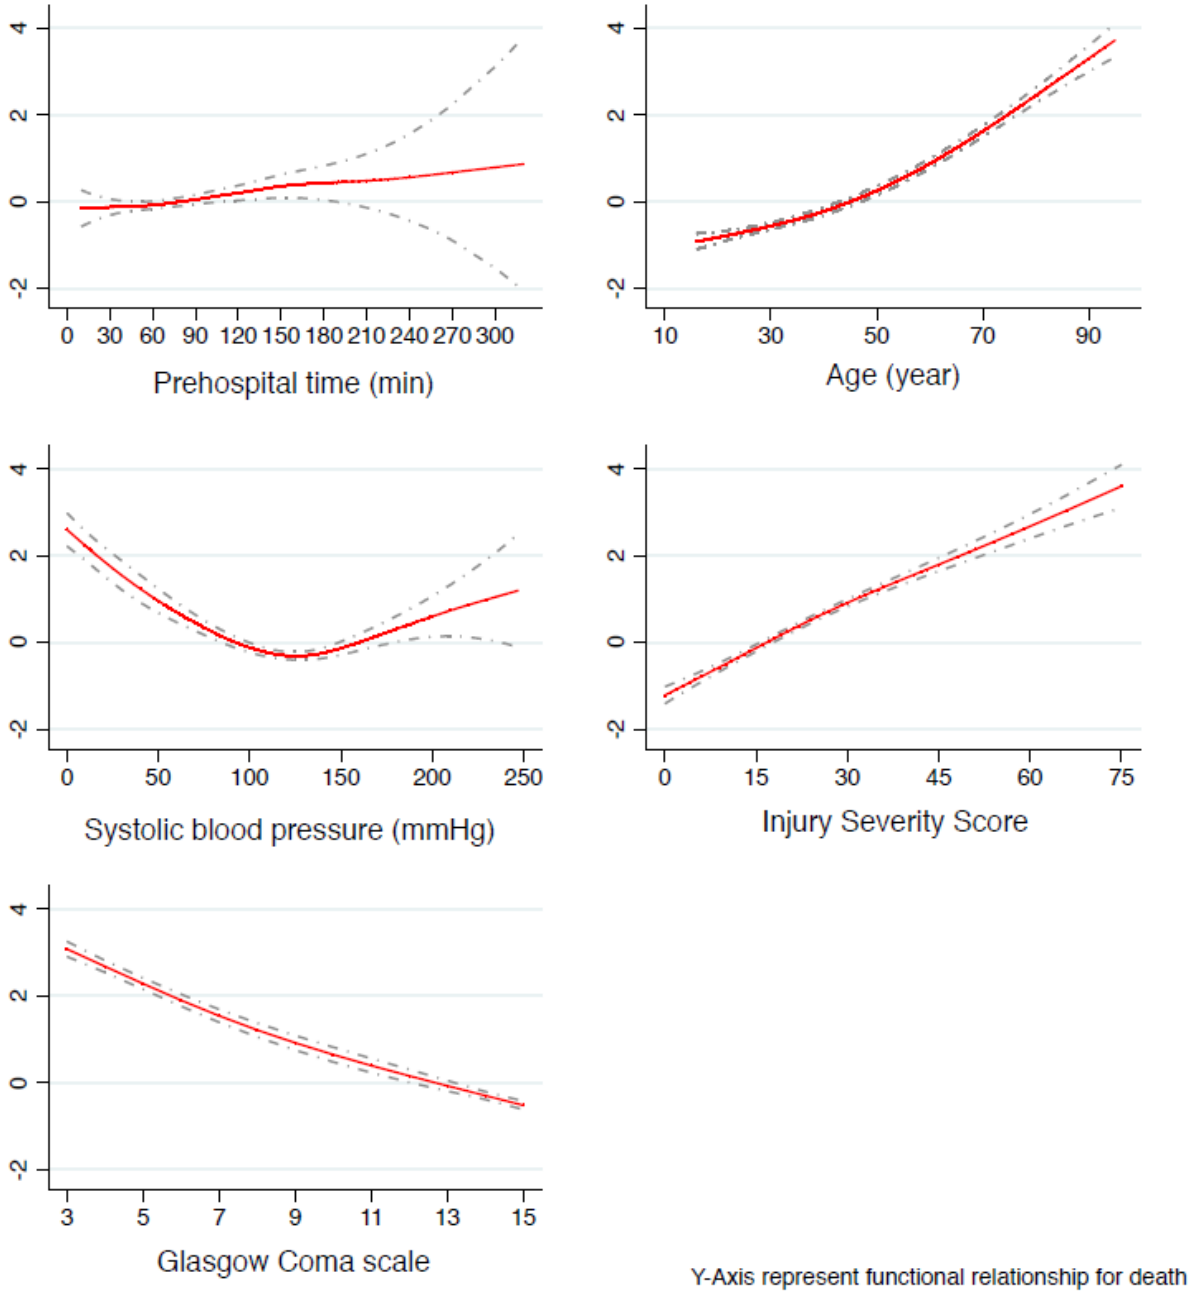

Supplement: jamasurg-154-1117-s001.pdf [file jamasurg-154-1117-s001.pdf]
